# Supplementary material
Source: MDPI journal article supplement (https://www.mdpi.com/2504-3900/100/1/4)
Supplement: s1 [file s1]

# Development of synergetic combinations of a novel apoptosis inducer with AKT and Hsp90 selective inhibitors targeting hormone-sensitive and hormone-resistant breast cancer cells

D.I. Salnikova <sup>\*1</sup>, S.K. Krymov <sup>2</sup>, D.V. Sorokin <sup>1,3</sup>, F.B. Bogdanov <sup>1,4</sup>, O.E. Andreeva <sup>1</sup>, A.I. Khamidullina <sup>5</sup>, A.E. Shchekotikhin <sup>2</sup>, A.M. Scherbakov <sup>1,3</sup>

<sup>1</sup> Department of Experimental Tumor Biology, Blokhin N.N. NMRC of Oncology, Kashirskoe shosse 24, 115522 Moscow, Russia; [dianasalnikova08@yandex.ru](mailto:dianasalnikova08@yandex.ru)

<sup>2</sup> Gause Institute of New Antibiotics, B. Pirogovskaya street 11, 119021 Moscow, Russia; [krymov.s.k@gmail.com](mailto:krymov.s.k@gmail.com), [shchekotikhin@gause-inst.ru](mailto:shchekotikhin@gause-inst.ru)

<sup>3</sup> National Research Lobachevsky State University, Gagarina prospect 23, 603950 Nizhny Novgorod, Russia; [Alex.Scherbakov@gmail.com](mailto:Alex.Scherbakov@gmail.com)

<sup>4</sup> Faculty of Medicine, Moscow State University, Lomonosovsky prospect 27 bldg. 1, 119991 Moscow, Russia

<sup>5</sup> Laboratory of Molecular Oncobiology, Institute of Gene Biology Russian Academy of Sciences, Vavilova street 34/5, 119334 Moscow, Russia; [alvina@genebiology.ru](mailto:alvina@genebiology.ru)

## INTRODUCTION & AIM

- The design and development of antitumor compounds based on an isatin core led to the synthesis of 1-substituted isatin-5-sulfonamides with potent antiproliferative activity [1].
- This investigation is aimed at new 1-substituted isatin-5-sulfonamides with pro-apoptotic properties alone and in combination with AKT and Hsp90 inhibitors on hormone-sensitive and hormone-resistant breast cancer cells [2].
- Keywords:** MCF7 breast cancer cell line; isatin-5-sulfonamides; 4-hydroxytamoxifen (HT); AKT Inhibitor IV; antiproliferative effect; resistance; synergism.

## METHODS

- The synthesis of 1-substituted isatin-5-sulfonamides involved 3 stages.
- The alkylation of isatin-5-sulfonamide via various benzyl chlorides allowed us to synthesize previously unknown series of 1-substituted isatin-5-sulfonamides.

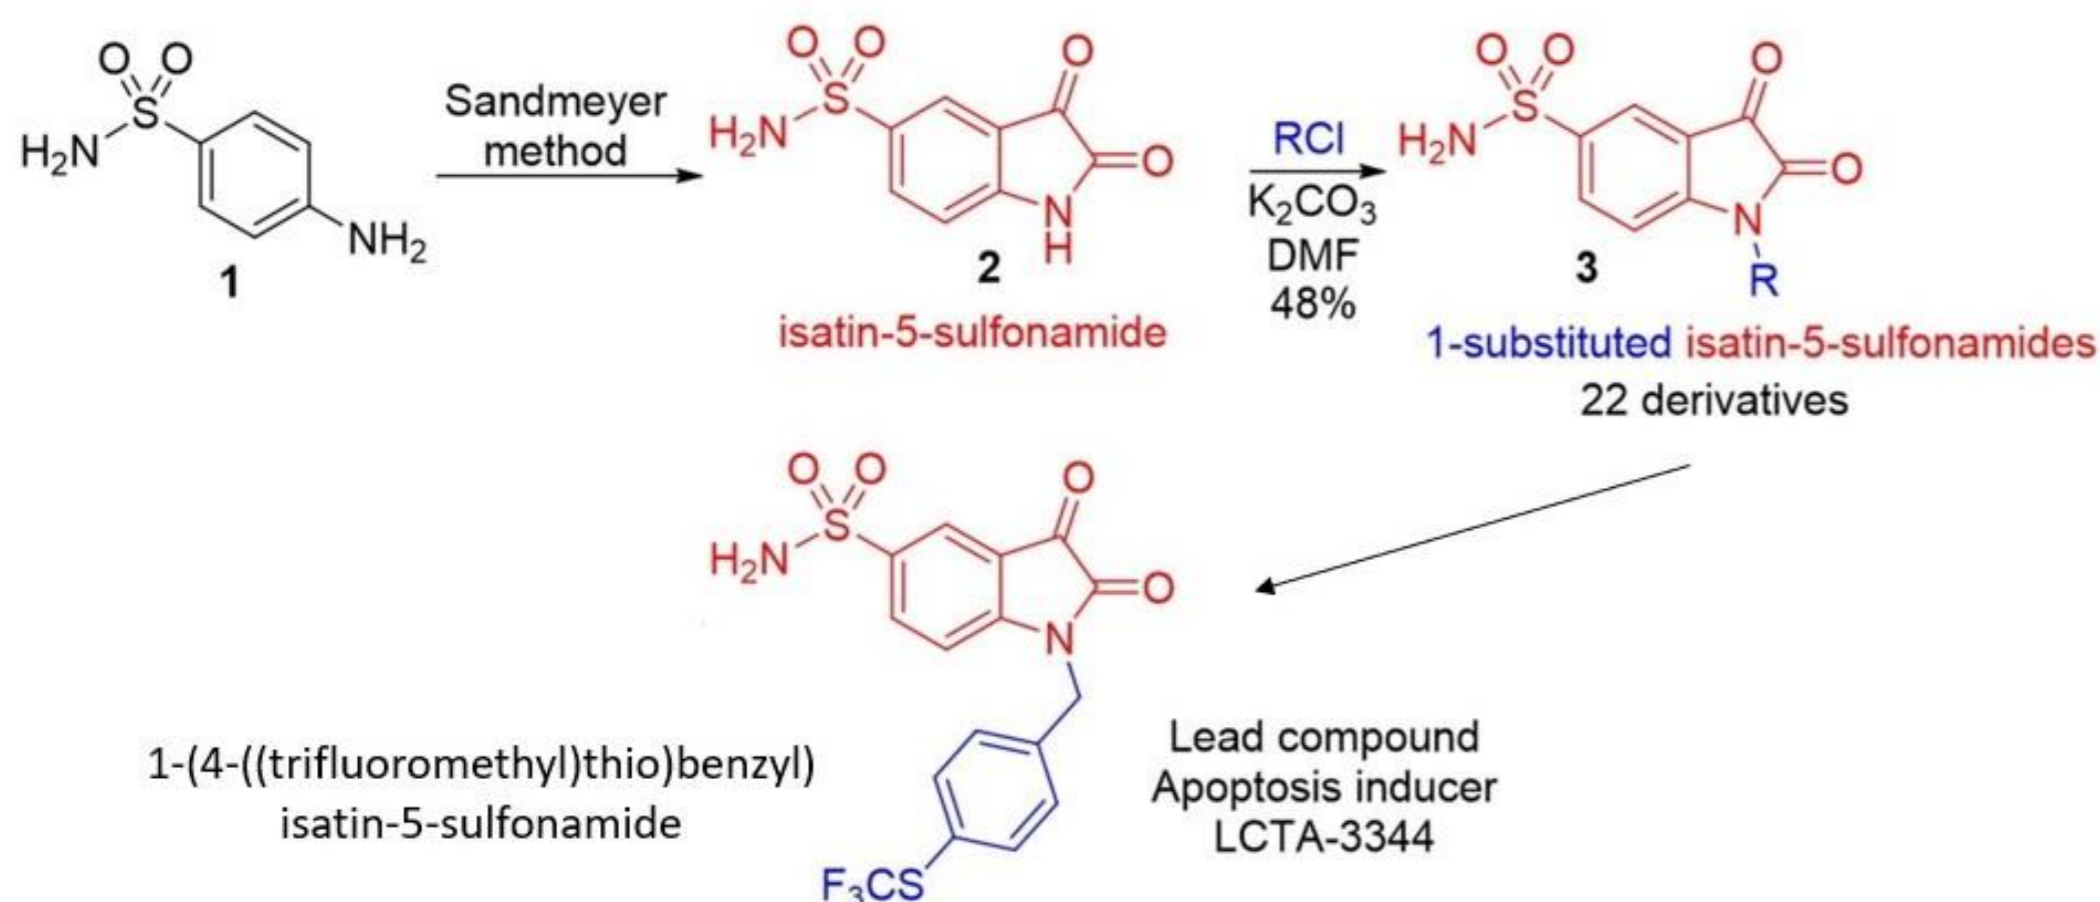

- HT was used to develop a MCF7-resistant subline (MCF7/HT) via the long-term incubation of MCF7 cells with HT.

- The  $IC_{50}$  values of HT were  $5.1 \pm 0.3 \mu M$  (MCF7) and  $10.2 \pm 0.4 \mu M$  (MCF7/HT); resistance index of 2 found.

- MCF7 cells were transfected with the p53 luciferase reporter plasmid to obtain MCF7/p53-LUC cells and assess p53 activity.

- A search for effective combinations of the lead compound with AKT Inhibitor IV, AKT Inhibitor X, and Hsp90 Inhibitor was performed.

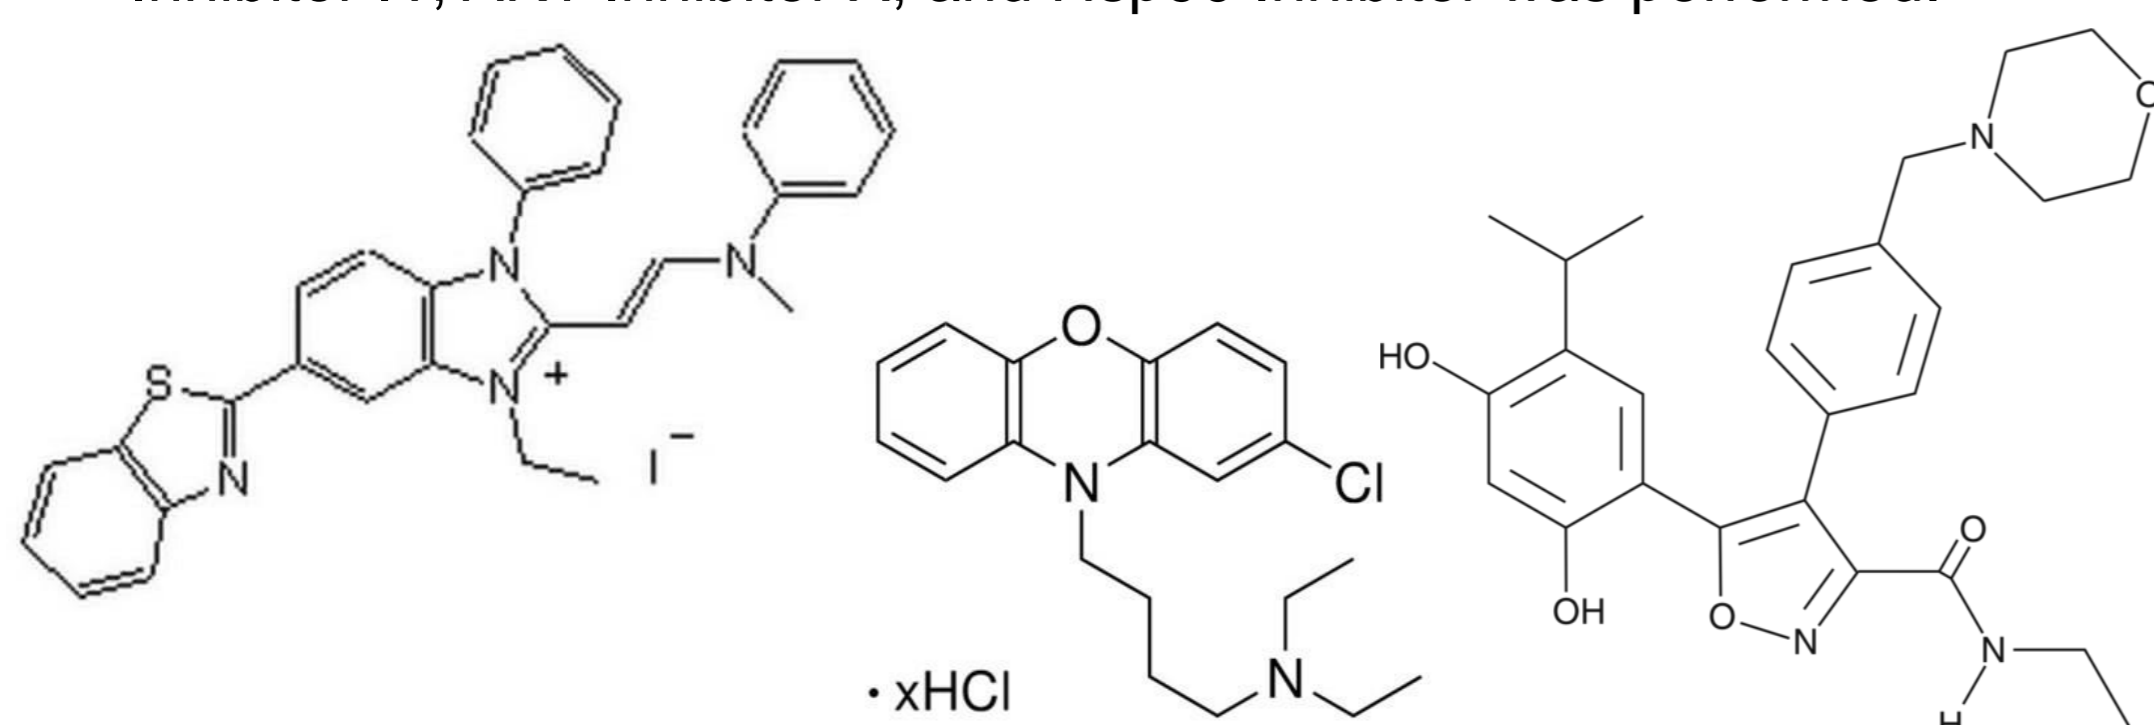

AKT Inhibitor IV (6-(2-benzothiazolyl)-1-ethyl-2-[2-(methylphenylamino)ethenyl]-3-phenyl-1H-benzimidazolium, monoiodide)

AKT Inhibitor X (10-DEBC; 2-chloro-N,N-diethyl-10H-phenoxazine-10-butanamine, hydrochloride)

Hsp90 Inhibitor (luminespib, NVP-AUY922; 5-[2,4-dihydroxy-5-(1-methylethyl)phenyl]-N-ethyl-4-[4-(4-morpholinylmethyl)phenyl]-3-isoxazolecarboxamide)

## RESULTS & DISCUSSION

- LCTA-3344 showed the highest antiproliferative activity; the effect was higher in MCF7/HT ( $IC_{50} = 1.4 \pm 0.1 \mu M$ ), than in MCF7 ( $2.6 \pm 0.3 \mu M$ ).

- Apoptosis detected by the PARP cleavage was higher in the presence of AKT Inhibitor IV rather, than LCTA-3344. The combination effect was synergetic. GAPDH was used as a loading control. Bcl-2 was a negative regulator of apoptosis.

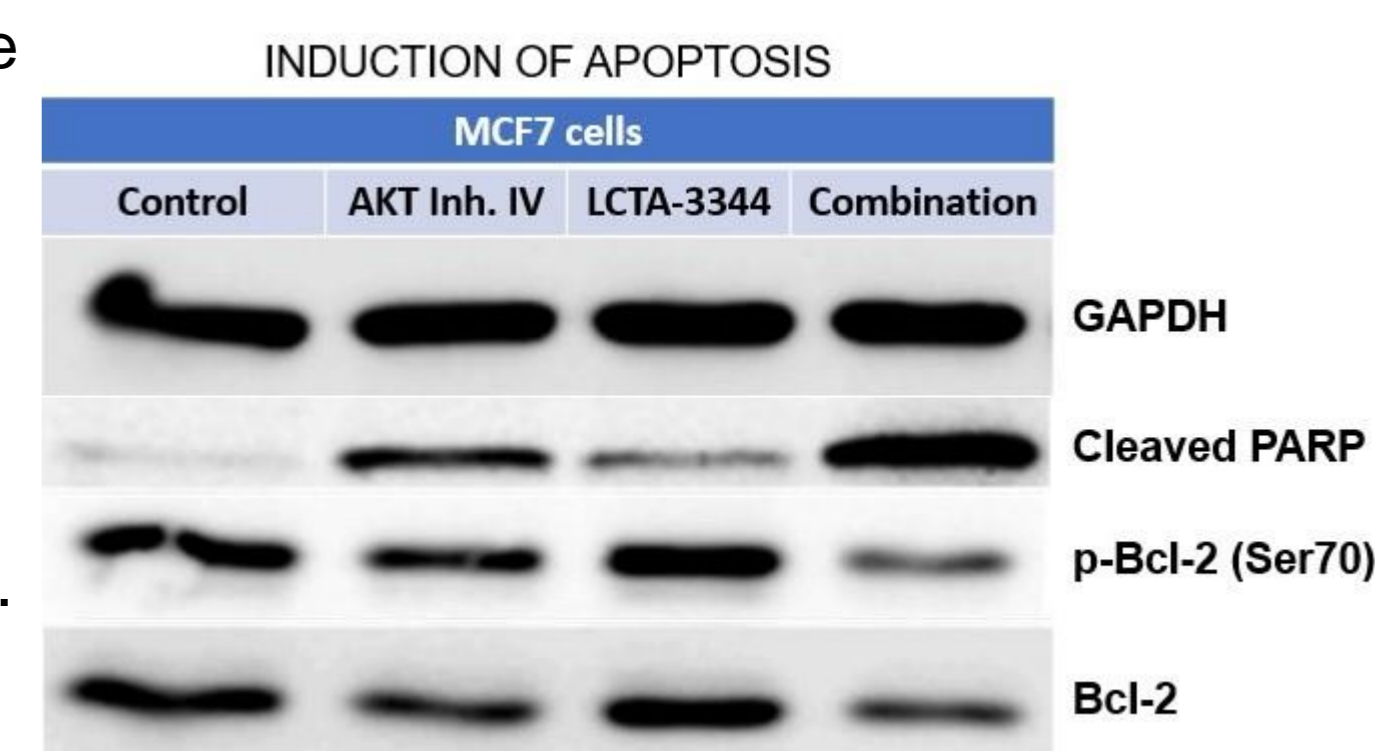

- LCTA-3344 did not increase luciferase activity in MCF7/p53-LUC cells, whereas doxorubicin has been identified as its strong inducer.

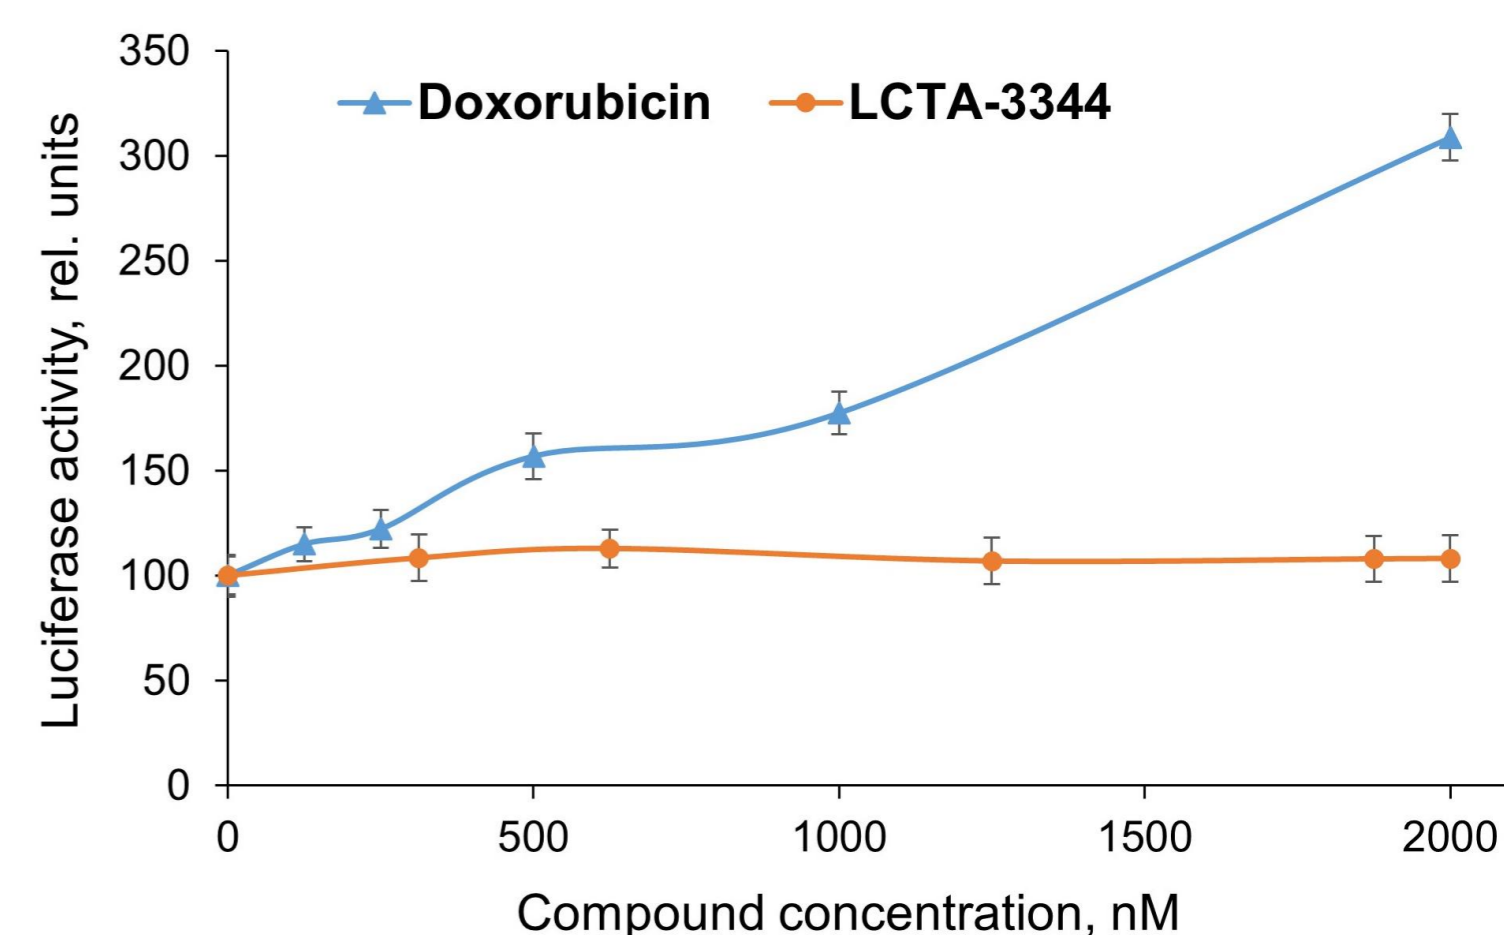

- The combinations of LCTA-3344 and AKT Inhibitor IV on MCF7 and MCF7/HT were synergetic with combination index (CI) values equal to 0.8 and 0.4 (a higher effect). Combinations with 10-DEBC and luminespib did not show such a high effect; minimal CI was 0.9.

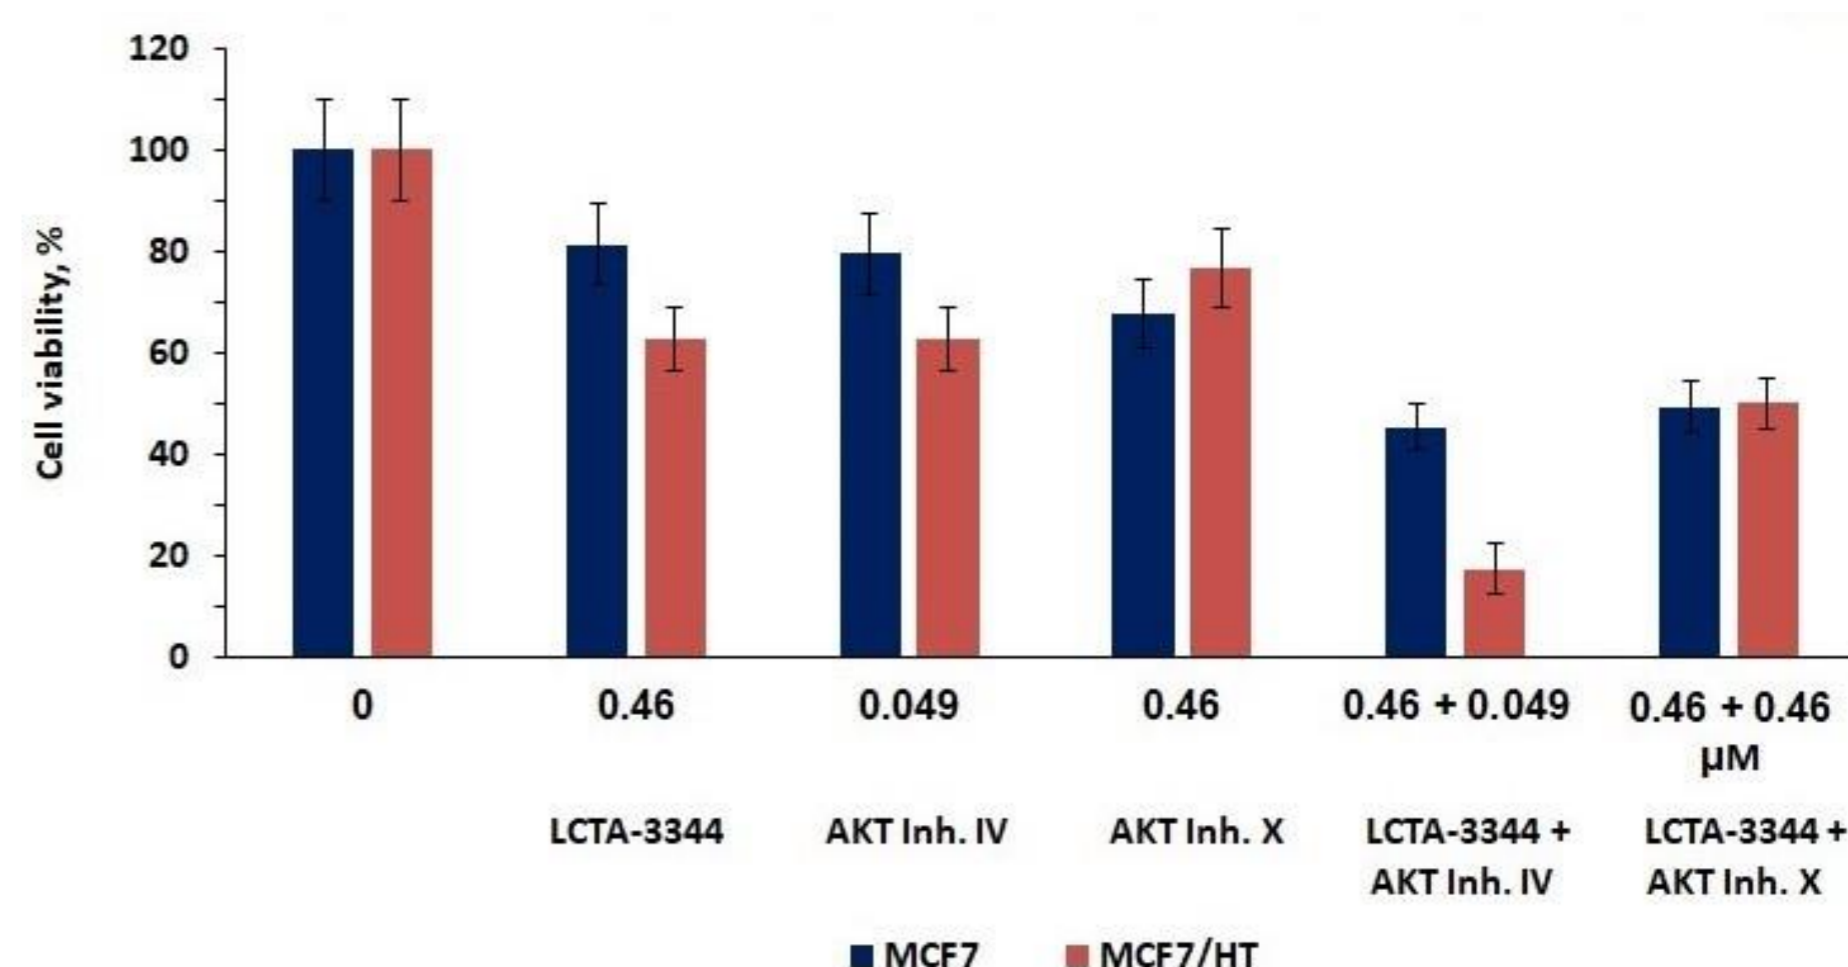

## CONCLUSION

- A leading 1-substituted isatin-5-sulfonamide LCTA-3344 was 1.9 times more effective against MCF7/HT, than parental cells.
- The most effective drug combination was LCTA-3344 with AKT Inhibitor IV on the MCF7/HT subline, CI 0.4.
- LCTA-3344 induced apoptosis with the p53-independent mechanism, which is important in the hormone-resistant breast cancer therapy.
- This research was partly funded by the Russian Science Foundation (20-13-00402, <https://rscf.ru/project/23-13-45035/>, 24.11.2023).

## REFERENCES

- Krymov S.K., Scherbakov A.M., et al. (2022). *Eur J Med Chem* **228**: 113997.
- Scherbakov A.M., Bogdanov F.B., Mikhaylova A.L., et al. (2023). *Med Sci Forum* **20**(1): 4.
